# Double Mutation in Photosystem II Reaction Centers and Elevated CO<sub>2</sub> Grant Thermotolerance to Mesophilic Cyanobacterium

Jorge Dinamarca<sup>1,3</sup>, Oksana Shlyk-Kerner<sup>1</sup>, David Kaftan<sup>2\*</sup>, Eran Goldberg<sup>1</sup>, Alexander Dulebo<sup>2</sup>, Manuel Gidekel<sup>3,4</sup>, Ana Gutierrez<sup>4</sup>, Avigdor Scherz<sup>1\*</sup>

**1** Department of Plant Sciences, The Weizmann Institute of Science, Rehovot, Israel, **2** Institute of Physical Biology, University of South Bohemia in České Budějovice, Nové Hradce, Czech Republic, **3** Departamento de Producción Agropecuaria, Universidad de La Frontera, Temuco, Chile, **4** VentureLab - Knowledge Center for Business, Universidad Adolfo Ibáñez, Santiago, Chile

## Abstract

Photosynthetic biomass production rapidly declines in mesophilic cyanobacteria grown above their physiological temperatures largely due to the imbalance between degradation and repair of the D1 protein subunit of the heat susceptible Photosystem II reaction centers (PSIIRC). Here we show that simultaneous replacement of two conserved residues in the D1 protein of the mesophilic *Synechocystis* sp. PCC 6803, by the analogue residues present in the thermophilic *Thermosynechococcus elongatus*, enables photosynthetic growth, extensive biomass production and markedly enhanced stability and repair rate of PSIIRC for seven days even at 43°C but only at elevated CO<sub>2</sub> (1%). Under the same conditions, the *Synechocystis* control strain initially presented very slow growth followed by a decline after 3 days. Change in the thylakoid membrane lipids, namely the saturation of the fatty acids is observed upon incubation for the different strains, but only the double mutant shows a concomitant major change of the enthalpy and entropy for the light activated Q<sub>A</sub><sup>-</sup>→Q<sub>B</sub> electron transfer, rendering them similar to those of the thermophilic strain. Following these findings, computational chemistry and protein dynamics simulations we propose that the D1 double mutation increases the folding stability of the PSIIRC at elevated temperatures. This, together with the decreased impairment of D1 protein repair under increased CO<sub>2</sub> concentrations result in the observed photothermal tolerance of the photosynthetic machinery in the double mutant

**Citation:** Dinamarca J, Shlyk-Kerner O, Kaftan D, Goldberg E, Dulebo A, et al. (2011) Double Mutation in Photosystem II Reaction Centers and Elevated CO<sub>2</sub> Grant Thermotolerance to Mesophilic Cyanobacterium. PLoS ONE 6(12): e28389. doi:10.1371/journal.pone.0028389

**Editor:** John R. Battista, Louisiana State University and A&M College, United States of America

**Received:** July 28, 2011; **Accepted:** November 7, 2011; **Published:** December 22, 2011

**Copyright:** © 2011 Dinamarca et al. This is an open-access article distributed under the terms of the Creative Commons Attribution License, which permits unrestricted use, distribution, and reproduction in any medium, provided the original author and source are credited.

**Funding:** This work was supported by the Avron-Minerva Foundation for Photosynthesis (7105640201) and the "Alternative Energy Resources Initiative" of the Weizmann Institute (7204880101). J.D. was also supported by the Programa Bicentenario-Banco Mundial, Conicyt, Chile (PBCT CTE-06) and FONDEF, Chile (D031-1079). D.K. was also supported by the Ministry of Education, Youth, and Sports of the Czech Republic (MSM6007665808), the Grant Agency of the Academy of Sciences of the Czech Republic (IAA608170901) and South Bohemian Research Center of Aquaculture and Biodiversity of Hydrocenoses (CZ.1.05/2.1.00/01.0024). The funders had no role in study design, data collection and analysis, decision to publish, or preparation of the manuscript.

**Competing Interests:** A.S. is the incumbent of the Robert and Yaddele Sklare Professorial Chair in Biochemistry. J.D. was supported by a fellowship from the Programa Bicentenario-Banco Mundial, Conicyt, Chile. This program has no commercial interest. This does not alter the authors' adherence to all the PLoS ONE policies on sharing data and materials.

\* E-mail: avigdor.scherz@weizmann.ac.il (AS); kaftan@ufb.jcu.cz (DK)

## Introduction

Photosystem II reaction center (PSIIRC) is a water/quinone oxido-reductase that catalyzes light-activated electron mobilization from the luminal (water oxidation site) to the stromal (quinone reduction site) side of the photosynthetic membrane. The electrons are transferred through the PSIIRC in a multi-step process initiated by photoexcitation of the primary electron donor (chlorophylls). This process is concluded by the double, stepwise reduction of a mobile quinone, termed Q<sub>B</sub>, by another quinone termed Q<sub>A</sub>. Impairment of the Q<sub>A</sub><sup>-</sup>→Q<sub>B</sub> electron transfer steps results in the recombination of electrons and holes, an increased probability of reactive oxygen species production, and attenuation of the PSIIRC repair [1,2,3]. The malfunctioning PSIIRC undergoes repair that involves its partial disassembly, removal, and proteolysis of the D1 protein subunit, generation of a new D1 protein, and refolding of the repaired PSIIRC to a functional complex [4,5,6]. Under physiological light and temperatures, the

rates of impairment and repair are balanced, and the steady-state concentration of the PSIIRC maintains continuous photosynthetic activity and growth. Failure to balance the two processes eventually results in cell death [2].

The activity of PSIIRC is highly sensitive to the ambient temperature [7,8,9,10,11]. Short-term temperature elevation was found to enhance the rate of light-induced oxygen evolution [12]. This phenomenon is reflected by a higher flux of electrons that traverse the PSIIRC complex. The increased flux is probably enabled by the enhanced rate of the Q<sub>B</sub>/Q<sub>B</sub>H<sub>2</sub> turnover because of the increased membrane fluidity under short exposure to elevated temperatures and before membrane lipids saturation takes place [13,14,15,16]. The increased flux has a dual effect: [1] it enhances the probability of localized reactive oxygen species (ROS) generation by PSIIRC and the subsequent impairment and degradation of the D1 subunit; [2] the increased supply of electrons to PSI and thereby to the carbon fixation domain results in an increased probability of ROS generation at that site that can

lead to the inhibition of protein synthesis and the consequent decrease of the D1 repair activity [17]. The oxidative stress imposed by the increased flow of electrons to the site of CO<sub>2</sub> fixation is further enhanced by the impairment and reduced activity of Rubisco (ribulose-1,5-bisphosphate carboxylase/oxygenase) at elevated temperatures [18,19,20,21,22]. Furthermore, at elevated temperatures the affinity of Rubisco for oxygen is increased relative to its affinity for CO<sub>2</sub> [19,23,24] resulting in increased photorespiration and overwhelming production of deleterious ROS that impair the D1 repair activity [3,25,26].

Short-term (minutes to a few hours) exposure to elevated temperatures results in reversible effects on the photosynthetic activity [27]. However, prolonged exposure (hours to days) to temperatures above the physiological range causes a strong imbalance in the rates of PSII repair and repair, resulting in the collapse of the photosynthetic machinery and death of the photoautotrophic organism [17,28]. Therefore, photosynthetic organisms have had to develop strategies to sustain their growth in extremely hot (thermophiles), intermediate (mesophiles), and extremely cold (psychrophiles) habitats. Despite this overall plasticity, the individual strains maintain activity over a narrow range of temperatures, typically  $\pm 5$ – $10^\circ\text{C}$  around their physiological optimum. Hence, prolonged global warming is expected to strongly diminish the PSII activity in mesophilic organisms, resulting in reduced biomass production, unstable ecosystems worldwide, as was already observed in oceanic coral populations, and in disruption of renewable energy and food resources [28,29,30,31,32]. Thus, maintaining a high rate of photosynthesis and biomass formation at elevated, non-physiological temperatures either by increasing the PSII stability or enhancing the rate of D1 repair or both, represent major challenges in acclimatizing photosynthetic mesophiles to global warming [7,9,33,34].

Although many studies have aimed at resolving the role of thylakoids' fatty acid saturation in inducing thermotolerance to photosynthetic organisms [35,36], we have focused on proteins comprising the PSII. Three major observations provided us with new clues for better understanding the strategy of PSII adaptation to elevated temperatures. First, as we previously showed, the temperature dependence of the first  $Q_A^- \rightarrow Q_B$  electron transfer rate in mesophiles and thermophiles follows Arrhenius kinetics until it levels off at  $T_o$ , which turned-out to be within the physiological temperature range of the examined mesophiles and thermophiles [37]. Second, screening the amino acid sequences in the D1 and D2 subunits of many photosynthetic thermophiles and mesophiles revealed consistent variations in two conserved sites: D1-212 and D1-209, within a GxxxG motif at the protein center [37]. More specifically, D1-Ser212 and D1-Ser209 in mesophiles are replaced by Cys and Ala in thermophiles. Third, single mutations at each of the aforementioned sites could increase the value of  $T_o$  by up to  $10^\circ\text{C}$ , in line with the observed values in thermophilic strains [37].

In view of the aforementioned observations and considerations we hypothesized that concomitant D1-Ser209Ala and D1-Ser212Cys (AC) mutations may improve the functional stability of PSII in mesophilic cyanobacteria grown at elevated temperatures. We further hypothesized that enhanced CO<sub>2</sub> concentration should compensate for the increased Rubisco affinity to oxygen at elevated temperatures and thereby reduce the impairment of the D1 repair mechanism by ROS as proposed by Murata *et al* [17] and Takahashi *et al* [26,28]. All together, we postulated that combination of double mutation and elevated CO<sub>2</sub> concentration would enable photoautotrophic growth and biomass production at temperatures that cannot be tolerated by the wild type.

The mutations were performed on the  $\Delta\text{KS}$  strain of *Synechocystis* sp. PCC 6803 which was selected as control because it retains only the intact wild-type *psbAIII* gene followed by a kanamycin resistance gene (*Kmr*) [38]. The absence of the other two gene copies, *psbAI* and *III* genes, which are replaced by spectinomycin (*Smr*) and chloramphenicol (*Cmr*) resistance cartridges, simplifies the interpretation of genetic modifications in the D1 protein subunit.

## Results

### The D1-S209A/D1-S212C double mutant (AC) grew photoautotrophically and produced biomass in 1% CO<sub>2</sub> atmosphere under continuous illumination at 43°C

The growth of AC in liquid cultures under continuous illumination ( $40 \mu\text{mol photons m}^{-2} \text{s}^{-1}$ ) was monitored and compared with that of  $\Delta\text{KS}$  at 30, 38, 40 and  $43^\circ\text{C}$ . There was no significant difference in the growth rates and pigmentation between the two strains when grown at  $30^\circ\text{C}$  (Fig. 1) under normal air bubbling or under 1% CO<sub>2</sub>. When incubated at 38 and  $40^\circ\text{C}$  the growth of the AC mutant was slightly slower (by 5 and 10% respectively), in comparison to the control strain that showed a much slower growth at both temperatures (by  $\sim 25$  and 29%, respectively) (Fig. 1). However, when grown at  $43^\circ\text{C}$ ,  $\Delta\text{KS}$  biomass slightly increased in the first 3 days of incubation followed by complete bleaching after 4 days regardless of the CO<sub>2</sub> content, whereas the AC mutant, when grown at  $43^\circ\text{C}$  and under 1% CO<sub>2</sub>, exhibited a growth rate that was only 25% lower than the one measured at  $30^\circ\text{C}$ , resulting in a 15-fold increase in OD<sub>730</sub> (Fig. 1) and an almost 10-fold increase in the dry biomass after 7 days of incubation (Fig. 2A).

Importantly, when grown at the same temperature but under stirring (no CO<sub>2</sub> supplement) the AC biomass increased at relatively slow pace and started to level off at the fourth day. Nevertheless, when transferred back to  $30^\circ\text{C}$  the growth was regained (Fig. 2B). In contrast, under the same conditions, the  $\Delta\text{KS}$  cultures leveled off after three days of slow growth and could not recover when transferred back to  $30^\circ\text{C}$  (Fig. 2B). Thus, although the AC mutant can survive a prolonged incubation at  $43^\circ\text{C}$ , normal growth at such temperature requires CO<sub>2</sub> supplement. Notably, the growth of wild type *Synechocystis* sp. PCC 6803 (having all three *psbA* genes) at  $43^\circ\text{C}$  and 1% CO<sub>2</sub> showed similar kinetics to that of  $\Delta\text{KS}$  with somewhat higher growth during the first three days of incubation followed by a slower decay from day 4 (Fig. 2C). The chlorophyll (Chl) content in  $\Delta\text{KS}$  and AC increased by 10-fold after 7 days of incubation at  $30^\circ\text{C}$  and 1% CO<sub>2</sub>. However, when grown at  $43^\circ\text{C}$ , the Chl content sharply declined in  $\Delta\text{KS}$  after 3 days, whereas that in the double mutant increased throughout the entire period of incubation to almost 3 times its initial value (Fig. 2D).

### The D1 and Rubisco proteins exhibited higher steady-state levels in the AC mutant compared with $\Delta\text{KS}$ , under continuous illumination, 1% CO<sub>2</sub> and $43^\circ\text{C}$

At  $30^\circ\text{C}$  the D1 and Rubisco proteins in both strains maintained a constant steady-state concentration throughout 7 days of incubation under continuous illumination (data not shown). However, upon incubation at  $43^\circ\text{C}$ , the D1 and Rubisco proteins content declined  $\sim 2$  and 2.2 times faster, respectively, in  $\Delta\text{KS}$  compared with the AC (Fig. 3). Thus, on the fifth day of incubation the D1 content dropped to  $\sim 4\%$  of its initial value (Fig. 3) and that of Rubisco reached non-significant levels for  $\Delta\text{KS}$ . In contrast, at the 6<sup>th</sup> day of incubation, the AC maintained  $\sim 15$

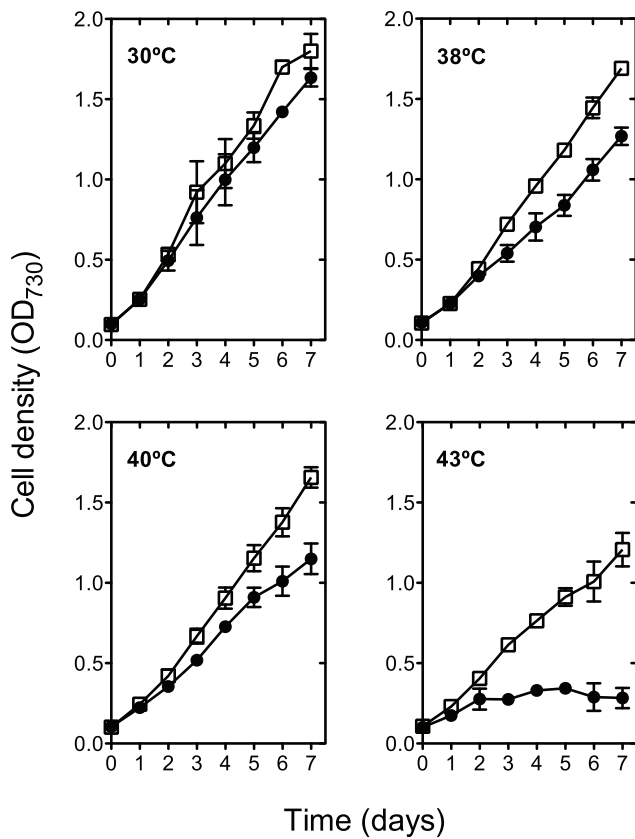

**Figure 1. Thermotolerance of *Synechocystis* sp. PCC 6803 AC mutant.**  $\Delta$ KS and AC cells (circles and squares, respectively) were grown in liquid medium for 7 days at 30, 38, 40 and 43°C under 1%  $\text{CO}_2$  aeration and  $40 \mu\text{mol photons m}^{-2} \text{s}^{-1}$ . Growth was monitored by measuring the optical density at 730 nm ( $\text{OD}_{730}$ ). The values represent the mean  $\pm$  SD of three independent experiments. doi:10.1371/journal.pone.0028389.g001

and  $\sim 8\%$  of its initial levels of D1 and Rubisco, respectively. At the 7<sup>th</sup> day of incubation, no traces of D1 were detected in  $\Delta$ KS, while  $\sim 8\%$  of its initial level was found in AC (Fig. 3).

#### Temperature dependence of the photosynthetic oxygen evolution in cells acclimated at 30 and 43°C under 1% $\text{CO}_2$

Figure 4A illustrates the temperature dependence of oxygen evolution by the strains grown for three days at 30 or 43°C. Briefly, samples were taken from each culture and then incubated for 10 minutes at the measuring temperature of 30 or 43°C (white and gray bars, respectively). Oxygen evolution by  $\Delta$ KS and AC grown at 30°C reached similar values when measured at 30°C ( $659$  and  $615 \mu\text{mol O}_2 \text{ mgChl}^{-1} \text{ h}^{-1}$ , respectively) with a twofold increase when measured at 43°C ( $1230$  and  $1290 \mu\text{mol O}_2 \text{ mgChl}^{-1} \text{ h}^{-1}$ , respectively). A remarkably different behavior was observed for  $\Delta$ KS and AC grown at 43°C. After 3 days, the oxygen evolution declined in  $\Delta$ KS to  $305$  and  $485 \mu\text{mol O}_2 \text{ mgChl}^{-1} \text{ h}^{-1}$  when measured at 30 and 43°C, respectively. The oxygen evolution by the AC mutant was markedly higher after three days of growth at 43°C:  $440$  and  $920 \mu\text{mol O}_2 \text{ mgChl}^{-1} \text{ h}^{-1}$  when measured at 30 and 43°C, respectively. All together, the rate of oxygen evolution by AC grown at 43°C and measured at 43°C ( $920 \mu\text{mol O}_2 \text{ mg Chl}^{-1} \text{ h}^{-1}$ ) was significantly higher than the activity of the  $\Delta$ KS grown at 43°C and measured at 43°C

( $485 \mu\text{mol O}_2 \text{ mg Chl}^{-1} \text{ h}^{-1}$ ), suggesting that the PSII activity in the AC mutant underwent acclimation and optimization at 43°C that allowed for retaining activity similar to the one measured under the short term exposure of cells to the elevated temperature, while the control strain did not show such capacity. After 7 days of incubation at 43°C the oxygen evolution activity in the AC mutant approached 20% of its initial value. However, that of  $\Delta$ KS dropped down to zero already at the fifth day of incubation (data not shown).

#### Temperature dependence of the $\text{Q}_A^- \rightarrow \text{Q}_B$ electron transfer rate

The  $\text{Q}_A^- \rightarrow \text{Q}_B$  electron transfer rate in  $\Delta$ KS grown at 30°C leveled off already at 26°C at a value of  $\sim 3400 \text{ s}^{-1}$  (Fig. 4B, closed circles) as previously reported [37]. The AC leveled off at a higher temperature of 35°C, though it reached only  $2500 \text{ s}^{-1}$  (Fig. 4B, closed squares). When grown at 43°C for three days, the small fraction of  $\Delta$ KS with active PSIIRC (Fig. S1) exhibited a low rate ( $\sim 1300 \text{ s}^{-1}$ ) of  $\text{Q}_A^- \rightarrow \text{Q}_B$  ET at 30°C that increased to  $\sim 2100 \text{ s}^{-1}$  at 43°C (Fig. 4B, open circles). In contrast, after  $>24$  h of acclimation at 43°C, the  $\text{Q}_A^- \rightarrow \text{Q}_B$  electron transfer rate in AC increased to  $\sim 3800 \text{ s}^{-1}$  when measured at 43°C and continued to rise exponentially reaching a rate of  $5200 \text{ s}^{-1}$  at 48°C (Fig. 4B, open squares and Fig. S3).

The dissimilarity in the temperature response of the  $\text{Q}_A^- \rightarrow \text{Q}_B$  rate constants between the AC mutant grown at 43°C, AC grown at 30°C, and  $\Delta$ KS grown at 30°C, reflects upon their different enthalpies and entropies of activation for the electron transfer reaction (Fig. 4C and Table 1). More specifically, the activation parameters of the AC mutant acclimated at 43°C ( $\Delta H^\ddagger = 7885 \text{ cal mol}^{-1}$ ,  $\Delta S^\ddagger = -17.2 \text{ cal mol}^{-1} \text{ K}^{-1}$ ) become close to those of the thermophilic *T. elongatus* grown at 56°C ( $\Delta H^\ddagger = 7142 \text{ cal mol}^{-1}$ ,  $\Delta S^\ddagger = -20.7 \text{ cal mol}^{-1} \text{ K}^{-1}$ ) and are markedly different from those measured for the AC and  $\Delta$ KS grown at 30°C (Table 1).

#### D1 Degradation and Repair

The maintenance of electron transfer and oxygen evolution activity in the AC can be attributed to the higher stability and/or to the enhanced repair rate of their PSIIRCs. To decipher the predominant contribution, we monitored the D1 content as a function of time in cells exposed to high light irradiances, either in the presence or in the absence of the protein synthesis inhibitor lincomycin (Fig. 5A and B).

The D1 protein content in both the AC and  $\Delta$ KS decayed during incubation at 43°C and under high light conditions. However, the decay of the D1 protein content in the mutant was markedly slower, reaching 20% of its initial value after 6 h of illumination (Fig. 5A). Lincomycin markedly accelerated the decay of D1 content in both  $\Delta$ KS and AC cultures. Nevertheless, after 6 hours the D1 protein content in the AC reached  $\sim 5$ – $10\%$  of the initial value whereas in  $\Delta$ KS it dropped to zero (Fig. 5A). Moreover, the difference between the levels of D1 in the absence and presence of lincomycin are  $\sim 2$  times larger for the AC compared with  $\Delta$ KS (Fig. 5A, insert), suggesting that enhanced PSIIRC repair in the AC plays a key role in maintaining high photosynthetic activity at elevated temperatures under elevated  $\text{CO}_2$  concentration.

Under the same conditions, the PSII activity was assessed by measuring the light-saturated steady-state rate of oxygen evolution in the presence of artificial electron acceptors (Fig. 5B). The oxygen evolving activity for both strains decreased during the treatment but the decrease was significantly more pronounced in  $\Delta$ KS. Thus, after 6 h of exposure, the  $\Delta$ KS and AC maintained

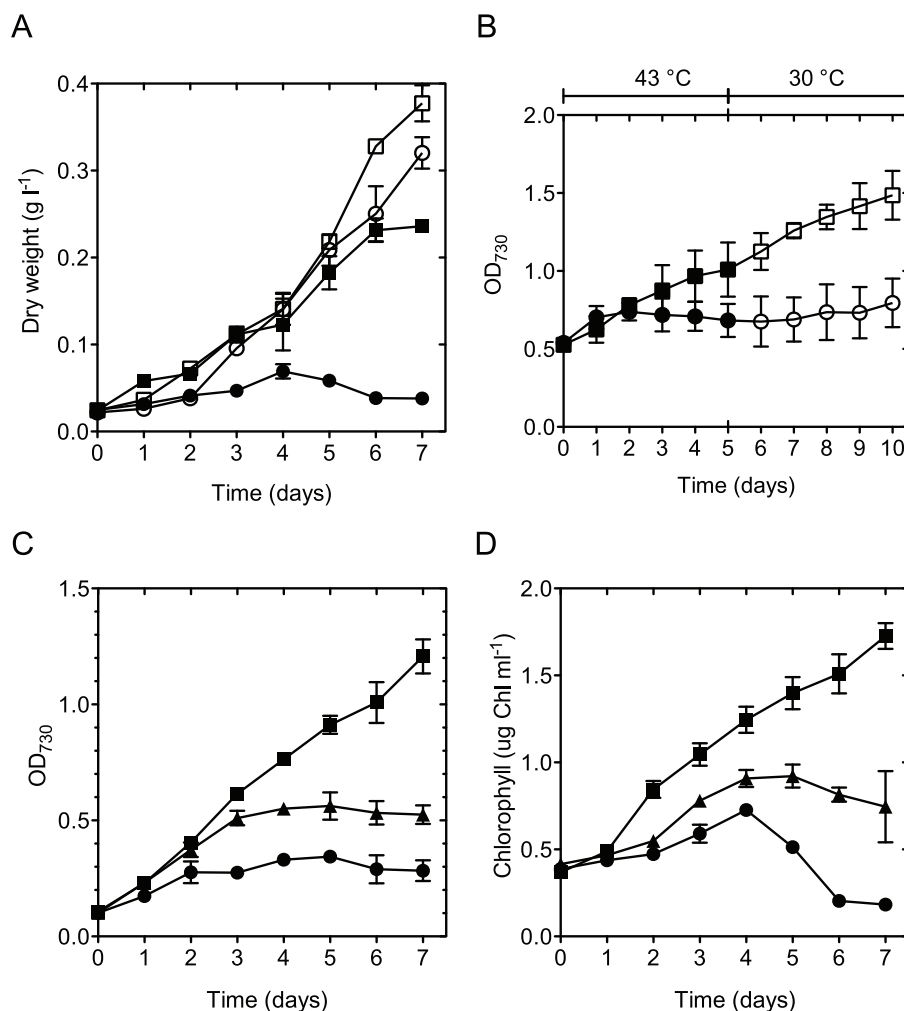

**Figure 2. Growth of *Synechocystis* control and AC mutant.** Growth was estimated by measuring dry weight (A), OD<sub>730</sub> (B and C) and chlorophyll content (D). **A.**  $\Delta$ KS and AC cells (circles and squares, respectively) that were grown in liquid medium for 7 days at 30° or 43°C (open and filled symbols, respectively) under 1% CO<sub>2</sub>. **B.**  $\Delta$ KS and AC cultured in liquid medium under stirring and normal air. The strains were incubated at 43°C for 5 days (filled symbols) and then transferred to 30°C (open symbols) for 5 days to test their viability. **C.** Wild-type (triangles),  $\Delta$ KS (circles) and AC cells (squares) were grown at 43°C under 1% CO<sub>2</sub>. **D.** Chlorophyll content in wild type,  $\Delta$ KS and AC cells (triangles, circles and squares, respectively) that have been transferred to 43°C and 1% CO<sub>2</sub> after 3–4 days incubation at 30°C and 1% CO<sub>2</sub>. The values represent the mean  $\pm$  SD of three independent experiments.

doi:10.1371/journal.pone.0028389.g002

~20 and 34% of their initial activity, respectively. However, upon adding lincomycin and thereby preventing PSIIRC repair,  $\Delta$ KS showed no oxygen evolution already after 4 h of incubation under high light while the AC mutant maintained 35% of its initial oxygen evolution activity at that time. After 6 h of illumination in the presence of lincomycin, the oxygen evolving activity of the AC mutant also dropped to a non-detectable value.

### Conformational changes and related energies that involve inter helical H-bonding of the mutated residues in PSIIRC

*In silico* introduction of the double mutation D1-A209S/D1-C212S to the resolved structure of *T. elongatus* provides insight into the structural and energetic differences between PSIIRC of wild-type *Synechocystis* sp. PCC 6803 and the AC mutant. Hereafter, we will refer to the structure of PSIIRC from *T. elongatus* [39,40,41] as representing the putative structure of the AC, and the one obtained by *in silico* D1-A209S/D1-C212S

double mutation, as representing the structure of  $\Delta$ KS *Synechocystis* sp. PCC 6803.

According to the energy minimized structure, D1-Cys212S $\gamma$  enters into an H-bond with the backbone carbonyl of D2-Met271. The DFT computations show that this conformation (Fig. 6B, GS = conf1') is at an energy minimum. The *in silico* mutation of D1-Cys212 to D1-Ser212 enables a similar ground state conformation, although the D1-Ser212O $\gamma$ ...D2-Met271 H-bond is longer than the D1-Cys212O $\gamma$ ...D2-Met271 H-bond (2.63 and 2.17 Å, respectively). The energy for this conformation is ~1 kcal smaller than the energy for conf1. The second low energy for this *in silico* mutant is one in which D1-Ser212O $\gamma$  is H-bonded to the backbone carbonyl of D2-Gly207 at 2.2 Å (Fig. 6A, conf2). The DFT computations show that although the energy of conf2 is at a local minimum, it is ~5.75 kcal mol<sup>-1</sup> higher than the energy acquired by conf1. The published structure of *T. elongatus* does not allow for conf2 because the distance between D1-Cys212S $\gamma$  and the backbone carbonyl of D2-Gly207 is too short (1.7 Å). Binding

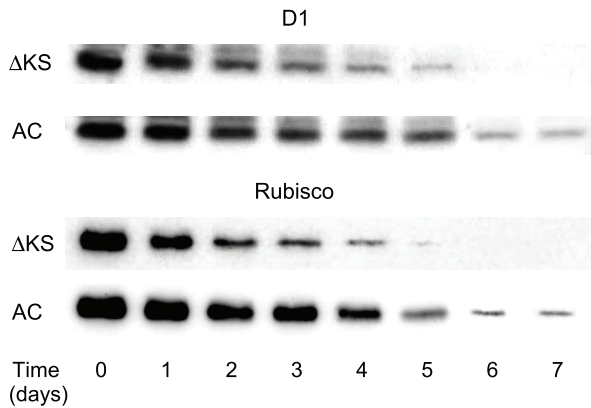

**Figure 3. Changes in the D1 and Rubisco large subunit protein content.**  $\Delta$ KS and AC cells were grown in liquid medium at 43°C under 1% CO<sub>2</sub>. Cells were collected at indicated times for isolation of proteins. Samples containing 1  $\mu$ g of chlorophyll were immunoblotted using antibodies specific against D1 and Rubisco (see Materials and methods). doi:10.1371/journal.pone.0028389.g003

at a slightly different geometry (Fig. 6B, conf2') is possible at an energy that is 6.75 kcal mol<sup>-1</sup> higher than the conf1 energy for D1-212Cys.

#### Molecular dynamics simulations reveal substantial changes in the relative geometries and energies of D helices in PSII RC during conf1(conf1') $\rightarrow$ conf2(conf2') transitions

The molecular dynamics simulations have provided insight into the interaction potential of the D helices of the D1 and D2 proteins (Fig. 7). Two interhelical hydrogen bonds were formed between the D helices of the D1 and D2 proteins of *T. elongatus*; the reciprocal bonding involved the D1-Cys212S $\gamma$  donating hydrogen to D2-Gly207O along with D1-Gly208O accepting hydrogen from D2-

Cys211S $\gamma$  (hydrogen bonding energies were 3.6 $\pm$ 1.2 and 3.5 $\pm$ 1.3 kcal mol<sup>-1</sup>, respectively, and hydrogen bond lengths were 2.1 $\pm$ 0.2 and 2.2 $\pm$ 0.2 Å, respectively). In *Synechocystis* sp. PCC6803, the two analogous interhelical bonds D1-Ser212O $\gamma$  to D2-Gly207O and D1-Gly208O from D2-Cys211S $\gamma$  had hydrogen-bonding energies 5.4 $\pm$ 0.9 and 3.9 $\pm$ 1.3 kcal mol<sup>-1</sup>, respectively, and the hydrogen bond lengths were 1.8 $\pm$ 0.2 and 2.1 $\pm$ 0.2 Å, respectively). An additional hydrogen bond was observed between D1-Ser209O $\gamma$  and D2-Ile204O (bond length 2.0 $\pm$ 0.2 Å, bond energy 4.2 $\pm$ 1.4 kcal mol<sup>-1</sup>). As a result of this change in the inter-helical hydrogen bond network, the D helices of the modeled mesophilic D1 and D2 proteins take on a conformation that is different from the thermophilic one. Namely, the average distance of the C $\alpha$  atoms at the helix-helix interface for  $\Delta$ KS (d[D1-S212 - D2-G207]) is 6.3 $\pm$ 0.3 Å, whereas that for *T. elongatus* or AC (d[D1-C212 - D2-G207]) is 6.6 $\pm$ 0.4 Å (Fig. 7). Thus, to form the new H-bond there is a need for a more relaxed environment. Also, the helix-helix contact area in *Synechocystis* hardly increased during the 20 ns simulation, whereas that of *T. elongatus* increased by >2-fold ( $A_{0\text{ ns}} = 165.8$  vs. 182.9 Å<sup>2</sup>,  $A_{20\text{ ns}} = 214.4$  vs. 428.3 Å<sup>2</sup> for *Synechocystis* and *T. elongatus*, respectively).

#### The effect of temperature on lipids and fatty acid composition in the thylakoid membrane of $\Delta$ KS and AC

It is well known that the photosynthetic membrane lipids present increased saturation with increasing temperature [42,43,44] in different strains of cyanobacteria and higher organisms. Such a change may affect the energy required for the D1 and D2 subunits to undergo the conformational changes required to enable the gating of the Q<sub>A</sub><sup>-</sup> $\rightarrow$ Q<sub>B</sub> electron transfer which was observed for the AC strain following >24 h of incubation at 43°C. Hence, we followed the timeline for the increased saturation of the thylakoid membranes in  $\Delta$ KS and AC and compared it with the observed changes in the thermodynamic parameters for the electron transfer (Table S1 and Table 2). In both  $\Delta$ KS and AC the double bond index (DBI) value decreased

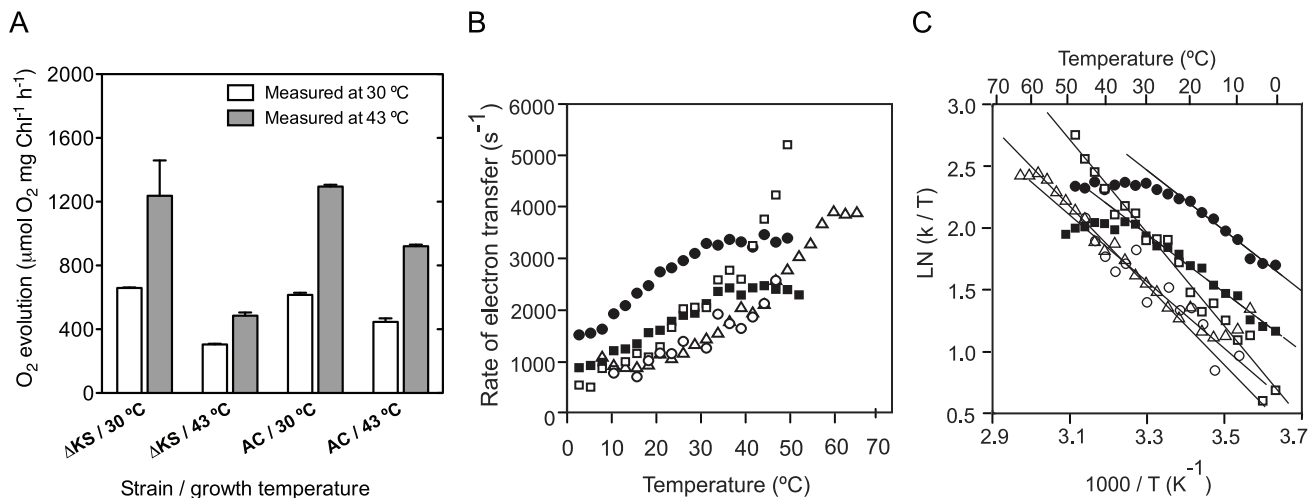

**Figure 4. Activity of the PSII RC in control and AC mutant.** Cells were grown for three days at 30° or 43°C (as indicated). **A.** The rate of oxygen evolution was measured at 30°C (white bars) and 43°C (gray bars) after 10 min incubation at the measuring temperature. The values represent the mean  $\pm$  SD of three independent experiments. **B.** Temperature dependence of the Q<sub>A</sub><sup>-</sup> $\rightarrow$ Q<sub>B</sub> ET rate constant for  $\Delta$ KS (circles) and AC (squares) grown at 30°C (closed symbols) and 43°C (open symbols). The corresponding curves for *T. elongatus* grown at 43°C are denoted by empty triangles. **C.** The values from B were used to construct the corresponding Eyring plots. The bold lines represent the linear fits of the various curves from which  $\Delta H^\ddagger$  (slope) and  $\Delta S^\ddagger$  (intercept with the Y axis) were derived. For more detailed conditions, see Materials and methods. For **B & C** the values represent the mean of 10–12 independent measurements, the error bars are not shown here for clarity. doi:10.1371/journal.pone.0028389.g004



**Table 1.** Thermodynamic parameters for the  $Q_A^- \rightarrow Q_B$  ET.

|                                                              | $\Delta$ KS 30°C | AC 30°C | $\Delta$ KS 43°C | AC 43°C | Te 43°C | Te 56°C |
|--------------------------------------------------------------|------------------|---------|------------------|---------|---------|---------|
| $\Delta S^\ddagger$ (cal mol <sup>-1</sup> K <sup>-1</sup> ) | -25.4            | -27.0   | -26.2            | -17.2   | -22.0   | -20.7   |
| $\Delta H^\ddagger$ (cal mol <sup>-1</sup> )                 | 5101.9           | 4950.2  | 5404.4           | 7885.5  | 6708.0  | 7142.6  |

The temperature dependence of  $Q_A^- \rightarrow Q_B$  ET in  $\Delta$ KS, AC and *T. elongatus* (Te) cells grown at the indicated temperature was measured as described in Materials and Methods. The activation parameters ( $\Delta S^\ddagger$ ,  $\Delta H^\ddagger$ ) were calculated from the Eyring plots (LN(k/T) vs. 1/T) in Figure 4C that represents the mean of 10–12 independent experiments.

doi:10.1371/journal.pone.0028389.t001

with increasing temperature and reached constant value after 24 h of incubation. This included a similar increase of the MGDG/DGDG ratio (Table S1). Importantly, the fatty acid composition in  $\Delta$ KS that grew at 30°C was found to be similar to the one previously reported for *Synechocystis* sp. PCC 6803 [36,45], with a relatively high percentage of polyenic acids that provided a fairly high DBI value (96.8). The DBI value in the AC mutant that was grown at 30°C was higher (104.6), mainly because of an increase of linoleic (18:2) and a decrease of palmitic (16:0) fatty acid contents, reflecting a more fluid membrane environment at standard growing conditions.

Incubation of  $\Delta$ KS and AC mutant at 43°C for >24 h was sufficient to decrease their DBI values to 78.9 and 86.2, respectively. A similar but somewhat lower value was reported by others for *Synechocystis* sp. PCC 6803 grown at 38°C [36]. The lower DBI is mainly the result of elevated levels of saturated palmitic (16:0) and a decrease of both unsaturated palmitoleic (16:1) and polyunsaturated gamma-linolenic (18:3 n6) fatty acid contents. Even though both strains showed a lower DBI after growth at 43°C, the AC exhibited a higher value than  $\Delta$ KS, which reflects a higher fluidity in the thylakoid membrane.

## Discussion

The goal of our research is to genetically engineer novel, mesophilic cyanobacteria that retain prolonged photosynthetic

activity and biomass production under continuous illumination at elevated temperatures to which the “wild type” cannot adjust. We hypothesized that PSIIRC should be a major target for such engineering and that genetic differences between the PSIIRC in thermophiles and mesophiles provide clues for new strategies. Following sequence alignment analysis, we found two sites within a GxxxG-like motif in the D1 protein subunit that are consistently occupied by different residues in thermophiles and mesophiles. In a previous study, we focused on the effect of single mutation on the electron transfer dynamic with respect to the ambient temperature [37]. Here, we aimed at deciphering the mutations effect on the bacterium viability at above its physiological temperature. Therefore, a double mutation was performed in the GxxxG-like motif, which made it identical to the one found in the thermophilic cyanobacterium *T. elongatus*. Indeed, only a slight decrease in the growth rate was shown by the AC mutant at 38 and 40°C, temperatures at which the  $\Delta$ KS grew at a much slower rate. More important, the double mutant presented prolonged photosynthetic activity and biomass growth during 7 days incubation at 43°C far above the growth temperature of wild-type *Synechocystis* sp. PCC 6803 or the  $\Delta$ KS strain that was used as control, but only under elevated CO<sub>2</sub> conditions (1%). The  $\Delta$ KS completely perished already after 6 days of incubation under identical growth conditions.

Notably, when  $\Delta$ KS and AC mutant cells were grown at 43°C but at lower CO<sub>2</sub> supply both strains showed slower growth.

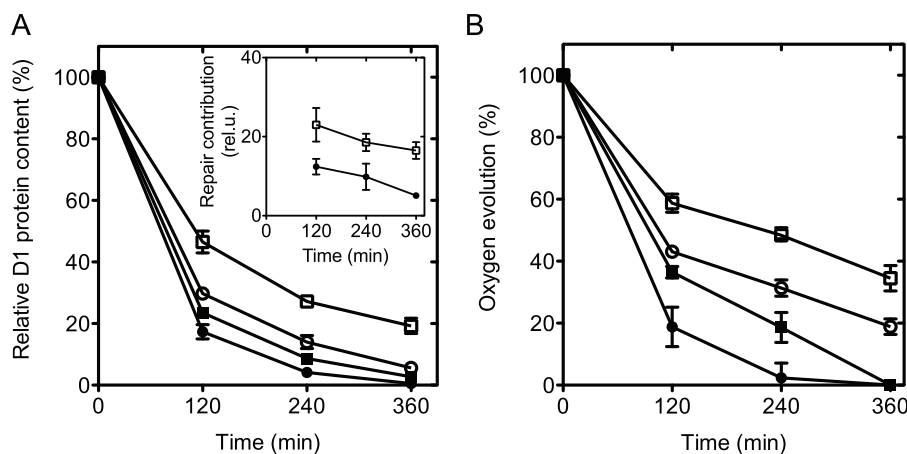

**Figure 5. The effect of high irradiance and elevated temperature on D1 protein content and PSII oxygen evolution.** The control  $\Delta$ KS (circles) and AC (squares) cells were incubated at 43°C and illuminated with 500  $\mu$ mol photons m<sup>-2</sup> s<sup>-1</sup> in the absence (open symbols) or presence (closed symbols) of lincomycin. Aliquots of the suspensions were taken at the indicated times. Samples were used for Western blot analysis and to measure the oxygen evolving activity as described in Materials and Methods. **A.** D1 protein content. Thylakoid membrane samples were analyzed by SDS-PAGE and immunoblotting using D1-specific antibody. The insert shows the contribution of the repair mechanisms, calculated as the difference between the content of D1 protein in the absence and presence of lincomycin. The data are shown after normalization to the value at the 0 time point. **B.** Oxygen evolution. The oxygen evolving activity was assayed in whole cells. For **A** & **B** the values represent the mean  $\pm$  SD of three independent experiments.

doi:10.1371/journal.pone.0028389.g005

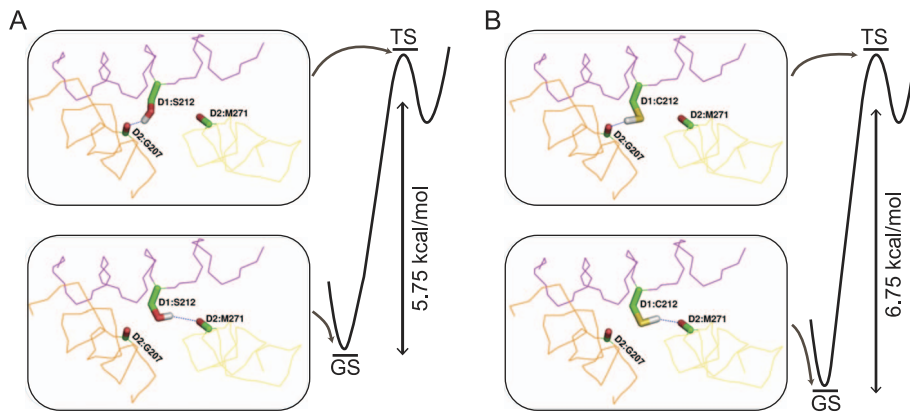

**Figure 6. Binding interactions between D1 and D2 proteins.** The proposed conformations for the ground (GS, conf 1) and transition (TS, conf2) states of  $Q_A^- \rightarrow Q_B$  in the *in silico* mutated D1-AC209/2125S (A) and the resolved wild-type structure of *T. elongatus* (B) representing the AC mutant structure.

doi:10.1371/journal.pone.0028389.g006

However, in all tested  $CO_2$  supply conditions (stirring, air bubbling and 1%  $CO_2$ ) the AC mutant showed higher growth than the  $\Delta KS$  (Fig. S2). Moreover, when the  $CO_2$  concentration was increased to 3% the AC mutant showed growth even at 45°C, while the  $\Delta KS$  grew only for 1 day (Fig. S2). The beneficial effect of the increased  $CO_2$  concentrations could be attributed to two mechanisms. First, the increased affinity of Rubisco to oxygen at elevated temperatures decreases  $CO_2$  fixation, which can subsequently increase the generation of ROS [19,23,24]. Furthermore, the reduction of molecular oxygen may lead into the formation of  $H_2O_2$  that inhibits the synthesis of PSII proteins and primarily of the D1 protein [3,25,26]. Second,  $CO_2$  solubility drops by estimated 30% upon increasing temperature from 30 to 45°C, further increasing the probability of Rubisco to react with oxygen. Thus, the increased  $CO_2$  concentration should help decreasing the probability of oxygen binding to the Rubisco and consequently the formation of radicals that could impair the D1 repair activity.

The longevity of the double mutant at the high temperature and elevated  $CO_2$  conditions, appears to be correlated with the markedly slower decline of the PSIIRC activity monitored by the levels of electron transfer and oxygen evolution activities as well as the level of the D1 protein subunit and Rubisco (Fig. 3 and 4). The relatively larger amplitude of the fastest component in the fluorescence decay curves (Fig. S1) provides an additional support for the enhanced functional stability of the PSIIRC in the AC mutant. Importantly, only when the level of D1 and Rubisco reach <20% and 5–10%, respectively, of the content found at room temperature, the rate of biomass growth slowed down (Fig. 1 and 3). This finding is in agreement with previous studies reporting that photosynthetic organisms with less than 50% of their steady state D1 level can still maintain the same rate of biomass formation because of the excess capacity of light-induced electron transfer in PSII [46,47]. Nevertheless, maintaining a normal growth rate, even at 10–20% Rubisco protein level, is an interesting finding that requires further investigation.

To elucidate the contributions of enhanced PSIIRC photo thermal stability and the rate of repair to the subunit steady-state concentration, we followed the decay of the D1 protein content and the concomitant PSII activity during exposure to high irradiance at 43°C in the presence and absence of lincomycin. The difference between the respective pair of measurements

(represented by full and empty symbols, respectively, in Fig. 5) represents the contribution of D1 and PSIIRC repair to the measured quantity, as demonstrated by the insert in Fig. 5A. In both strains, the D1 protein content and oxygen evolution activity exhibited a decrease during the exposure and this decrease was enhanced in the presence of lincomycin (Fig. 5A and B). Nevertheless, the AC mutant showed higher content of D1 protein and higher activity than the  $\Delta KS$  during the course of the treatment both in the absence and presence of lincomycin. These results suggest that both the stability (Fig. 5A and B) and repair (Fig. 5A, insert) of the D1 protein are enhanced in the double mutant compared with  $\Delta KS$ . The increased rate of repair in the AC mutant may reflect upon increasing rate of PSIIRC refolding with the mutated D1 protein or, upon higher photo/thermal stability of the mutated *psbA* mRNA. This question is currently being explored in our lab.

We previously showed that the rate of  $Q_A^- \rightarrow Q_B$  electron transfer levels off at  $T_o$ , which was defined as the optimal temperature for electron transfer, and it was found to be within the physiological range of the examined strain, 26°C for  $\Delta KS$  and ~59°C for *T. elongatus* [37]. Importantly, the rate of  $Q_A^- \rightarrow Q_B$  electron transfer at  $T_o$  is similar for mesophiles and thermophiles, reaching a value of 3000–4000  $s^{-1}$ . Apparently, at this rate the balance between PSIIRC degradation and repair, as well as other enzymatic processes that comprise photosynthetic charge separation and carbon fixation, is optimal. This observation is in line with the corresponding hypothesis, which suggests that psychrophilic (cold-adapted), mesophilic, thermophilic and hyperthermophilic homologous enzymes have comparable catalytic efficiencies (indicated by  $k_{cat}/K_M$ ) at their respective optimal temperatures because optimal activity requires a certain degree of conformational flexibility in the active site [48,49]. Hence, one can reasonably assume that for inducing thermotolerance and biomass generation, as has been sought in this study,  $Q_A^- \rightarrow Q_B$  electron transfer needs to reach and maintain a value of ~3500  $s^{-1}$  when growing at the elevated target temperature. Following the transition state theory, the rate of  $Q_A^- \rightarrow Q_B$  electron transfer is given by  $\langle k_{el} \rangle = (k_b T/h) \exp(-\Delta E^\ddagger/RT)$ , where  $k_b$  and  $h$  represent the Boltzmann and Max-Planck constants, respectively, and  $\Delta E^\ddagger = \Delta H^\ddagger - T\Delta S^\ddagger$  is the activation energy [37]. Thus, maintenance of similar electron transfer rates at the physiological optima of mesophiles and thermotolerant/thermophiles can be achieved

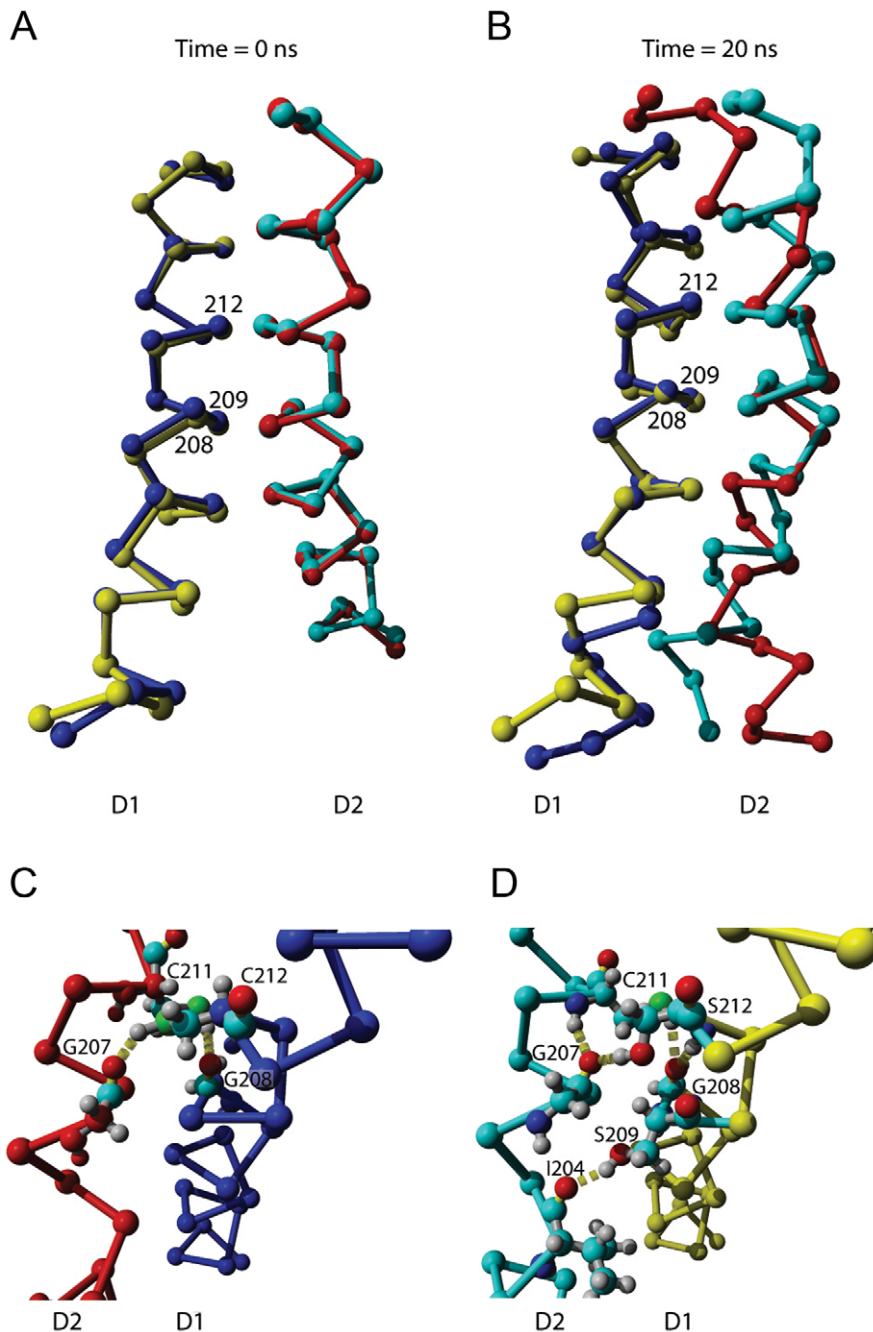

**Figure 7. Molecular dynamics simulation of D helix conformations and interactions of the D1 and D2 proteins. A–D.** Following energy minimization, the  $C_{\alpha}$  atoms of the D helices of *Synechocystis* sp. PCC6803 and *T. elongatus* exhibit almost identical structures at the start of the simulation (A). Significant deviation is seen mostly on the periphery of the helices at the end of the simulated 20 ns dynamics (B). Close up of the central part of the helices shows additional details of the hydrogen bond network in *T. elongatus* (C) and *Synechocystis* sp. PCC6803 (D). D1 and D2 helices are respectively shown in blue and red for *Synechocystis* sp. PCC6803 and in yellow and cyan for *T. elongatus*. doi:10.1371/journal.pone.0028389.g007

by adjusting the  $\Delta E^{\ddagger}$ , or more specifically, the  $\Delta H^{\ddagger}$  and  $\Delta S^{\ddagger}$  values, to the ambient temperatures. As shown above, the  $\Delta H^{\ddagger}$  and  $\Delta S^{\ddagger}$  values for AC during prolonged incubation at 30°C are slightly different from those of  $\Delta K_S$  and therefore  $k_{et}$  reaches maximal value and levels at  $\sim 33^{\circ}\text{C}$  (Fig. 4C and Table 1). However, after  $\geq 24$  h of acclimation at 43°C,  $\Delta H^{\ddagger}$  and  $\Delta S^{\ddagger}$  of the AC are changed by  $+3 \text{ kcal mol}^{-1}$  and  $-9.8 \text{ cal mol}^{-1} \text{ K}^{-1}$ , respectively (Table 1). With these new values,  $k_{et}$  is equal to  $3500 \text{ s}^{-1}$  only when reaching  $T = 42^{\circ}\text{C}$ , which becomes the new

optimal temperature ( $T_o$ ) for PSIIRC activity. Likewise, provided that the optimal rate for electron transfer in *T. elongatus* is also  $\sim 3500 \text{ s}^{-1}$ , (Fig. 4C) acclimation at 43°C results in  $\Delta H^{\ddagger}$  and  $\Delta S^{\ddagger}$  values that provide the optimal  $k_{et} = 3500 \text{ s}^{-1}$  at  $T_o = 52^{\circ}\text{C}$ , whereas growth at 56°C acclimatizes the strain for  $k_{et} = 3500 \text{ s}^{-1}$  at  $T_o = 57^{\circ}\text{C}$ . Cumulatively, the change in thermodynamic data after  $>24$  h of incubation combined with the DFT calculations and dynamic simulations suggest that the PSIIRC ground state is more stable by at least 2 kcal mol $^{-1}$  in the AC (Fig. 6).



**Table 2.** Fatty acids in thylakoid membranes from  $\Delta$ KS and AC mutant cells grown at different temperatures.

| Strain      | Temperature | Fatty acids |      |      |      |       |                  |      |                |         |      |       |
|-------------|-------------|-------------|------|------|------|-------|------------------|------|----------------|---------|------|-------|
|             |             | 16:0        | 16:1 | 16:2 | 18:0 | 18:1c | 18:1t            | 18:2 | 18:3 n3        | 18:3 n6 | 18:4 | DBI   |
| $\Delta$ KS | 30°C        | 53.4        | 10.2 | 0.3  | 0.4  | 4.8   | 0.4              | 10.9 | <sup>b</sup> – | 19.1    | 0.4  | 96.8  |
|             | 43°C        | 58.3        | 6.6  | 0.3  | 0.6  | 9.2   | 0.8              | 11.4 | 1.2            | 11.4    | 0.3  | 78.9  |
| AC          | 30°C        | 49.6        | 10.3 | 0.6  | 0.3  | 5.9   | 0.4              | 12.3 | –              | 20.0    | 0.6  | 104.8 |
|             | 43°C        | 53.3        | 6.7  | 0.4  | 0.3  | 13.1  | <sup>a</sup> tr. | 12.9 | 1.0            | 11.9    | 0.3  | 86.2  |

Cells were grown at the indicated temperature for three days. Total lipids were extracted from thylakoid membranes and fatty acids were analyzed as described in Materials and Methods. The double-bond index (DBI) is the sum of percentages of unsaturated fatty acids multiplied by total number of double bonds. The values are the means of three independent experiments and are expressed as mol %. The deviation of values was within  $\pm 2\%$ .

<sup>a</sup>tr. Trace amount (less than 0.2%).

<sup>b</sup>–. Non-detected.

doi:10.1371/journal.pone.0028389.t002

The change in the  $Q_A^- \rightarrow Q_B$  electron transfer rate and the related thermodynamic parameters, appears to occur after  $>24$  h of incubation at 43°C under 1%  $CO_2$  (Fig. S3), this appears to correlate with the timeline for increased saturation of the membrane lipids in *Synechocystis*, already reported by others [36,44]. Loll et al (2007) identified six MGDG, four DGDG, three SQDG, one PG as well as three  $\beta$ -DM molecules per PSIIRC monomer. The most recent structure [50] reports 1 more DGDG (5 in total), 1 more SQDG (4 in total) and 4 more PG (5 in total). According to Sakurai et al (2006), only MGDG and DGDG contain the 18:3 fatty acids that undergo saturation and consequently rigidification, similarly to the trend observed here upon incubating  $\Delta$ KS and AC at 43°C (Table 2). Moreover, the percentage of these lipids in thylakoid membranes and isolated PSIIRC is practically the same [45,51]. Hence, the MGDG and DGDG, which interact with PSIIRC, may experience the aforementioned 18:3 $\rightarrow$ 18:1 and 16:1 $\rightarrow$ 16:0 transition under prolonged temperature elevation. The resulting rigidification of the lipids interacting with D1/D2 proteins should modify any process involving a protein conformational change that requires displacement of these lipids. The possibility of such conformational changes in the studied strains is discussed in the following text.

The activation energy for the  $Q_A^- \rightarrow Q_B$  electron transfer process is indicative of dissociation of 1–2 H-bonds [37] upon transferring from a ground to a transition state during the  $Q_A^- \rightarrow Q_B$  electron transfer. The molecular dynamic simulations (Fig. 7) indicate that alternating H-bonding association or dissociation of the D1 and D2 protein subunits involve an average 0.7–1 Å expansion of the D1/D2 complex in the AC but not in  $\Delta$ KS. At a high level of desaturation (e.g. following incubation at 30°C), reflected by a high DBI value (Table 2), the flexible lipid bed provides similar low resistance to conformational changes of the D1/D2 in  $\Delta$ KS and the AC. The higher DBI value for AC compared to  $\Delta$ KS, possibly reflect upon the larger membrane flexibility that is needed to allow the larger PSIIRC expansion during electron transfer. However, following acclimation at elevated temperatures, the increased saturation makes the lipid environment of the PSIIRC more rigid than at room temperature and the conformational change in the AC needs to overcome an additional energy barrier accounting for part of the markedly increased  $\Delta H^\ddagger$ . The enhanced rigidity of the lipids should decrease the entropy of the  $Q_A^- Q_B$  state and therefore the value of  $\Delta S^\ddagger$  for the  $Q_A^- \rightarrow Q_B$  transition is reduced. The experimental values of the thermodynamic parameters (Table 1) fit the putative conformational changes and the involved energies that are presented in Figure 6, following the DFT computations. Thus

the thermodynamic parameters show both stabilization of the ground state and enhanced conformational rigidity of the AC after acclimation at the elevated temperature. Such enhancement is often proposed to account for the increased thermal stability of the thermophilic enzymes compared with mesophiles [52].

The significance of fatty acid saturation in regulating enzymatic reactions that depend on protein conformational changes, was explored using lipid specificity for the reconstitution of well-coupled ATPase proteoliposomes [53]. Different approaches attempted to decipher the role of saturation/desaturation in adapting the photosynthetic machinery to temperature changes (for a recent review see: Allakhverdiev et al, 2008). However, a recent study claims that membrane protein stability does not depend on the lipid composition of the membrane [54] and arguments against lipid saturation per se as a regulator of thermotolerance were raised [36]. The present study supports the possibility that both lipid saturation/rigidification and point mutations that modify the protein structure at the transition state may be required for controlling the activation energy for the rate-determining electron transfer and for inducing thermotolerance to the PSIIRC. Namely, as the growth temperature is increased to 43°C,  $\Delta H^\ddagger$  and  $\Delta S^\ddagger$  for the AC mutant should be changed for maintaining  $k_{et}$  at 3000–3500  $s^{-1}$ . To that end the DBI value decreases to counteract the increased fluidity of the membrane at elevated temperatures.

At the same time our study suggests that in addition to the enhanced functional stabilization of the PSIIRC complex, there is a need to attenuate the impairment of the D1 repair machinery at elevated temperature, possibly by providing more  $CO_2$  as a sink for the accumulation of redox equivalents.

Furthermore, the sequence, structure, and thermodynamic similarities between the PSIIRC in the AC and *T. elongatus* suggest that the AC double mutation could account for the thermophilicity of existing strains and could provide a first step for adapting mesophilic photosynthetic organisms.

## Materials and Methods

### Growth conditions and treatments

Stock cultures of the control strain  $\Delta$ KS and the double mutant D1-S209A/D1-S212C (hereafter, AC) were grown photoautotrophically at 30°C in BG-11 medium under continuous illumination with aeration of 1.0%  $CO_2$  in air (1 l  $min^{-1}$ ). Cultures of similar cell density were incubated at 30, 38, 40 or 43°C under 40  $\mu mol$  photons  $m^{-2} s^{-1}$  white light. Growth was monitored by measuring the optical density of the culture at 730 nm ( $OD_{730}$ ) and the dry weight biomass. Changes in chlorophyll concentration

were measured spectroscopically by sampling aliquots from the liquid cultures every 24 hours as previously described [55]. In some experiments, the protein synthesis inhibitor lincomycin was added to the cell suspension (final concentration  $200 \mu\text{g ml}^{-1}$ ) at the start of the treatment [6]. *Thermosynechococcus elongatus* BP-1 [56] cells were grown at 30, 43 or  $56^\circ\text{C}$  under a light intensity of  $40 \mu\text{mol photons m}^{-2} \text{s}^{-1}$  white light in liquid BG-11 medium.

### PCR-based mutagenesis

Mutagenesis on the  $\Delta\text{KS}$  strain was performed as previously described [37] with the following modifications. The S209/212 primer 5'-GGT GGA TTC GGT GGT **GCC** TTG TTC **TGT** GCC ATG CAT GGT TCC-3' was prepared to insert mutations at bp 625–627, corresponding to the aminoacid D1-Ser209 and at bp 634–636, corresponding to D1-Ser212 [57], to obtain the D1-S209A/D1-S212C double mutant.

### Isolation of proteins and Western blot analysis

Thylakoid membranes were prepared as previously described [58]. Whole-cell extract samples were obtained from the same preparation and used for Rubisco Western blot analysis. Proteins were solubilized in sample buffer (0.5 M Tris-HCl pH 6.8, 1% SDS, 24% glycerol, 4%  $\beta$ -mercaptoethanol, 0.001% (w/v) Bromophenol blue), incubated at room temperature for 1 hour and then separated on 12.5% SDS-PAGE. The equivalent of  $1 \mu\text{g}$  of chlorophyll was loaded in each well. Proteins were electroblotted to PVDF (Hybond-P, Amersham, UK) using a BioRad Mini Transblot Cell (Bio-Rad, USA). The immuno detection was carried out using a chemiluminescence kit (SuperSignal West Pico, Pierce, USA). Antibodies against D1 and RuBisCO large subunit proteins were purchased from Agrisera (Umeå, Sweden). For quantification the bands from the scanned blots were quantified by integrating variable pixel intensities using the ImageJ software [59] and comparing them to a dilution series of samples (Fig. S4).

### Oxygen evolution rate

Light-saturated ( $1500 \mu\text{mol photons m}^{-2} \text{s}^{-1}$ ) steady-state rate of oxygen evolution was measured using a Clark-type platinum silver electrode in a thermostated glass cuvette (Hansatech, Inc., England). Cells were harvested at the indicated times by centrifugation and re-suspended in fresh media to a final concentration of  $10 \mu\text{g chlorophyll ml}^{-1}$ . The cells were kept in the dark for 10 min at the measuring temperature before being measured. A total of 3 ml of cells was added to the electrode chamber and the artificial electron acceptors 2,5-dimethyl-p-benzoquinone (DMBQ) (0.5 mM final concentration) and ferricyanide (1 mM final concentration) were added just before measurement. The temperature was maintained at 30 or  $43^\circ\text{C}$  with a circulating water bath. Calibrations at both measuring temperatures were made to adjust the sensitivity of the electrode.

### Extraction, preparation, and analysis of thylakoid membrane lipids and their fatty acids

Thylakoid membranes were isolated as described [60]. Thylakoid lipid extraction was carried out according to [61]. Lipid classes were separated by thin-layer chromatography on silica gel (Merck 5721) with chloroform/methanol/acetic acid/water (90:9:12:2 v/v) as the developing solvent. TLC plates were sprayed with 0.05% solution of primuline. Lipid spots were visualized with a hand-held UV lamp VL-6.M (Vilber Loumart, France) in order to assess the quality of separation or to mark lipids for scraping and extraction. The plates were then scanned and the spots were quantified by integrating variable pixel intensities on

ImageJ software [59] and comparing them to standard curves. Lipid spots on the TLC plates were scrapped-off and later subjected to transmethylation [62]. The esterified fatty acids were analyzed with a gas-liquid chromatograph (HRGC 5300, Carlo Erba instruments) equipped with a hydrogen flame-ionization detector. The double bond index (DBI) was calculated by dividing the sum of the percentages of the unsaturated fatty acids, each multiplied by the number of its double bonds, by 100.

### Flash Fluorescence Measurements

The rate constant for the first  $Q_A$  to  $Q_B$  electron transfer was assessed as recently described [37]. The percentage of active PSIIRC was deduced from the relative contribution of the fast component to the overall decay of the intact cell fluorescence as previously described [27,37,63].

### DFT calculation and protein dynamics

PSII structural coordinates at  $2.9 \text{ \AA}$  resolution (PDB ID: 3bz1, [40]) were downloaded from the PDB and hydrogen atoms were added using REDUCE [64]. Relevant parts of helices D and E from D1 (aa 203–217, aa 268–281) and D2 (aa 202–216, aa 264–277) were extracted and capped with hydrogen atoms at the N- and C-termini; only this four-helix bundle was considered in the following calculations since D1-C212 does not interact with other parts of the protein. The possible H-bonds formed by this cysteine's side-chain were determined by optimizing its  $S\gamma$ ,  $H\gamma$ ,  $1H\beta$ , and  $2H\beta$  atoms (all other atoms were frozen) at 12 initial side-chain conformations, defined by combinations of  $\chi_1$  ( $180^\circ$ ,  $+60^\circ$ ,  $-60^\circ$ ) and  $\chi_2$  ( $180^\circ$ ,  $+90^\circ$ ,  $0^\circ$ ,  $-90^\circ$ ) dihedral angles. These 12 optimizations resulted in a global minimum and several local minima. A similar procedure was applied for D1-C212S by adjusting the bond lengths and angles of its  $O\gamma$ . For an accurate calculation of the H-bond geometries and energies, while considering the four surrounding helices, a quantum mechanics/molecular mechanics (QM/MM) hybrid method was utilized. Specifically, a two-layer ONIOM approach [65], as implemented in GAUSSIAN 03 [66], was applied. The QM layer for the D1-C212 (and D1-S212) optimizations consisted of the following atoms:  $C\alpha$ ,  $H\alpha$ ,  $C\beta$ , (2X) $H\beta$ ,  $S\gamma$  (or  $O\gamma$ ), and  $H\gamma$  of D1-C212;  $C\alpha$ , (2X) $H\alpha$ , C, and O of D2-G207; N and H of D2-A208 and D2-C211;  $C\alpha$ ,  $H\alpha$ , C, and O of D2-M271; N and H of D2-L272; N,  $C\delta$ , (2X) $H\delta$ ,  $C\gamma$ , and (2X) $H\gamma$  of D2-P275. The DFT-B3LYP/6-31+G\*\* level of theory was used for the QM layer. The hybrid B3LYP [67,68] functional was used as an intermediate-level means of including electron correlation, since it has been shown to produce accurate geometries compared with protein structures [69] and realistic H-bond energies in ligand protein systems [70]. The double- $\zeta$  6-31+G\*\* basis set contains polarization functions on all atoms and diffuse functions on heavy atoms. The MM layer, consisting of all other atoms, was modeled by the Amber force field [71], and its partial charges were able to polarize the QM wavefunction (electronic embedding).

We did not find significant differences in the results when using the most recent PSII crystal structure [50].

**Molecular dynamics simulations.** The simulations were performed with YASARA [72]. The 3D structures of the D helices of the D1 and D2 proteins in thermophilic *Thermosynechococcus elongatus* were obtained from the crystal structure of cyanobacterial PSII (PDB ID: 3BZ1) [40] D1(196–221): PFHQLG VAGVF-GGALFCAMHGLVTS; D2(195–219): PFHMMGVAGVLG-GALLCAIHGATVE. The *in silico* mutagenesis of two amino acid residues in the D1 sequence - A209S and C212S (underlined) mimicked the native structure of the mesophilic *Synechocystis* sp. PCC6803. The D2 sequence of the D helix differs only at the site

204 – the thermophile valin was replaced for isoleucine in the mesophile. Both models of the mesophilic and thermophilic D helices of the D1 and D2 proteins were placed in the periodic boundary simulation boxes that were 1 nm larger than the peptides along all three axes. After hydrogen atoms were added to the helices according to basic chemistry rules and the currently selected pH = 8.0, the boxes were filled with TIP3P water, and sodium atoms were iteratively placed at the coordinates with the lowest electrostatic potential until the cell was neutral. Molecular dynamics simulations were run using a multiple time step of 1.25 fs for intra-molecular and 2.5 fs for intermolecular forces. To remove bumps and to correct the covalent geometry, the structures were energy-minimized with the Yamber3 force field [73] using a 8.0 Å force cutoff and the Particle Mesh Ewald algorithm [74] to treat long-range electrostatic interactions. After removal of conformational stress by a short steepest descent minimization, the procedure was continued by simulated annealing (time step 2 fs, atom velocities scaled down by 0.9 every 10th step) until convergence was reached, i.e., the energy improved by less than 0.012 kcal mol<sup>-1</sup> during 200 steps. The simulations were then run at 300 K at a constant pressure (NPT ensemble) to account for volume changes due to fluctuations of peptides in the solution. The simulations were run for a total time of 20 ns. Molecular graphics were created with YASARA [72] and Persistence of Vision (TM) Raytracer (<http://www.povray.org/>).

## Supporting Information

**Figure S1 Amplitudes of the fast decay component of chlorophyll fluorescence.** The amplitudes represent the relative contribution of PSIIRCs that perform normal Q<sub>A</sub><sup>-</sup>→Q<sub>B</sub> electron transfer to the total PSIIRC content. Fluorescence was measured in ΔKS grown at 30°C (open circles), ΔKS grown at 43°C (filled circles), AC grown at 30°C (open squares), AC grown at 43°C (filled squares) and *T. elongatus* grown at 43°C (open triangles). The values represent the mean of at least 10 independent experiments; the error bars are not shown here for clarity. (EPS)

**Figure S2 Photoautotrophic growth of the ΔKS and AC mutant cells at elevated temperatures and various CO<sub>2</sub> concentrations.** ΔKS (circles) and AC mutant (squares) cells were grown at the indicated temperature and CO<sub>2</sub> supply under 40 μmol photons m<sup>-2</sup> s<sup>-1</sup>. The inserts show the same data using a different scale. Growth was monitored by measuring the optical

density at 730 nm (OD<sub>730</sub>). The values represent the mean ± SD of three independent experiments. (EPS)

**Figure S3 Changes in the Q<sub>A</sub><sup>-</sup>→Q<sub>B</sub> electron transfer rates upon incubation at 43°C.** AC mutant cells growing at 30°C for 3 days were transferred to 43°C and their Q<sub>A</sub><sup>-</sup>→Q<sub>B</sub> electron transfer rate was measured at the indicated times (See Materials and methods). The values represent the mean ± SD of three independent experiments. (EPS)

**Figure S4 D1 and Rubisco proteins immunoblot signal response.** A dilution series of ΔKS (circles) and AC (squares) thylakoid membrane samples was loaded in SDS-PAGE and subsequently immunoblotted using specific antibodies raised against D1 (A) and Rubisco (B) proteins. Immunoblot signal changes were quantified by integrating variable pixel intensity from scanned blots. The values were normalized to the sample containing 1 μg of chlorophyll. The data represent the mean ± SD of three independent experiments. (EPS)

**Table S1 Thylakoid membrane lipids composition in *Synechocystis* sp. PCC6803 and *Thermosynechococcus elongatus* grown at the indicated temperatures.** Lipids were extracted from thylakoid membranes. Lipid classes were separated by thin-layer chromatography, sprayed with a primuline solution and quantified by integrating variable pixel intensities of the scanned plates. The values represent the mean of three independent experiments. The deviation of values was within ± 2%. Monogalactosyldiacylglycerol, MGDG; digalactosyldiacylglycerol, DGDG; phosphatidylglycerol, PG; sulfoquinosyldiacylglycerol, SQDG. (DOC)

## Acknowledgments

The authors thank J. Barber, I. Vass, and M. Edelman for critically reading the manuscript and helpful discussions; thanks go also to J. Kopecky and M. Lukes for help with lipid analysis.

## Author Contributions

Conceived and designed the experiments: JD OS-K DK AS. Performed the experiments: JD OS-K DK EG AD AS. Analyzed the data: JD OS-K DK EG AD MG AG AS. Wrote the paper: JD OS-K DK AS.

## References

- Szilard A, Sass L, Hideg E, Vass I (2005) Photoinactivation of photosystem II by flashing light. *Photosynth Res* 84: 15–20.
- Vass I, Cser K (2009) Janus-faced charge recombinations in photosystem II photoinhibition. *Trends Plant Sci* 14: 200–205.
- Nishiyama Y, Yamamoto H, Allakhverdiev SI, Inaba M, Yokota A, et al. (2001) Oxidative stress inhibits the repair of photodamage to the photosynthetic machinery. *Embo Journal* 20: 5587–5594.
- Aro EM, Suorsa M, Rokka A, Allahverdiyeva Y, Paakkarinen V, et al. (2005) Dynamics of photosystem II: a proteomic approach to thylakoid protein complexes. *J Exp Bot* 56: 347–356.
- Edelman M, Mattoo AK (2008) D1-protein dynamics in photosystem II: the lingering enigma. *Photosynth Res* 98: 609–620.
- Komenda J, Tichy M, Prasil O, Knoppova J, Kuvikova S, et al. (2007) The exposed N-terminal tail of the D1 subunit is required for rapid D1 degradation during photosystem II repair in *Synechocystis* sp PCC 6803. *Plant Cell* 19: 2839–2854.
- Allakhverdiev SI, Kreslavski VD, Klimov VV, Los DA, Carpentier R, et al. (2008) Heat stress: an overview of molecular responses in photosynthesis. *Photosynth Res* 98: 541–550.
- Kakani VG, Surabhi GK, Reddy KR (2008) Photosynthesis and fluorescence responses of C-4 plant *Andropogon gerardii* acclimated to temperature and carbon dioxide. *Photosynthetica* 46: 420–430.
- Berry J, Bjorkman O (1980) Photosynthetic response and adaptation to temperature in higher plants. *Ann Rev Plant Physiol* 31: 491–543.
- Mamedov M, Hayashi H, Murata N (1993) Effects of Glycinebetaine and Unsaturation of Membrane-Lipids on Heat-Stability of Photosynthetic Electron-Transport and Phosphorylation Reactions in *Synechocystis* Pcc6803. *Biochim Biophys Acta* 1142: 1–5.
- Santarius KA (1976) Sites of Heat Sensitivity in Chloroplasts and Differential Inactivation of Cyclic and Noncyclic Photophosphorylation by Heating. *J Therm Biol* 1: 101–107.
- Inoue N, Taira Y, Emi T, Yamane Y, Kashino Y, et al. (2001) Acclimation to the growth temperature and the high-temperature effects on photosystem II and plasma membranes in a mesophilic cyanobacterium, *Synechocystis* sp. PCC6803. *Plant Cell Physiol* 42: 1140–1148.
- Beney L, Gervais P (2001) Influence of the fluidity of the membrane on the response of microorganisms to environmental stresses. *Appl Microbiol Biotechnol* 57: 34–42.
- Horvath G, Melis A, Hideg E, Droppa M, Vigh L (1987) Role of Lipids in the Organization and Function of Photosystem-II Studied by Homogeneous Catalytic-Hydrogenation of Thylakoid Membranes In situ. *Biochim Biophys Acta* 891: 68–74.
- Horvath I, Glatz A, Varvasovszki V, Torok Z, Pali T, et al. (1998) Membrane physical state controls the signaling mechanism of the heat shock response in

- Synechocystis PCC 6803: Identification of hsp17 as a “fluidity gene”. *Proc Natl Acad Sci U S A* 95: 3513–3518.
16. Huner NPA, Maxwell DP, Gray GR, Savitch LV, Krol M, et al. (1996) Sensing environmental temperature change through imbalances between energy supply and energy consumption: Redox state of photosystem II. *Physiol Plant* 98: 358–364.
  17. Murata N, Takahashi S, Nishiyama Y, Allakhverdiev SI (2007) Photoinhibition of photosystem II under environmental stress. *Biochim Biophys Acta* 1767: 414–421.
  18. Kim K, Portis AR (2004) Oxygen-dependent H<sub>2</sub>O<sub>2</sub> production by Rubisco. *Febs Letters* 571: 124–128.
  19. Kim KM, Portis AR (2006) Kinetic analysis of the slow inactivation of Rubisco during catalysis: effects of temperature, O<sub>2</sub> and Mg<sup>++</sup>. *Photosynth Res* 87: 195–204.
  20. Brooks A, Farquhar GD (1985) Effect of Temperature on the Co<sub>2</sub>/O<sub>2</sub> Specificity of Ribulose-1,5-Bisphosphate Carboxylase Oxygenase and the Rate of Respiration in the Light - Estimates from Gas-Exchange Measurements on Spinach. *Planta* 165: 397–406.
  21. Chen ZX, Spreitzer RJ (1992) How Various Factors Influence the Co<sub>2</sub>/O<sub>2</sub> Specificity of Ribulose-1,5-Bisphosphate Carboxylase Oxygenase. *Photosynth Res* 31: 157–164.
  22. Jordan DB, Ogren WL (1984) The Co<sub>2</sub>/O<sub>2</sub> Specificity of Ribulose 1,5-Bisphosphate Carboxylase Oxygenase - Dependence on Ribulosebiphosphate Concentration, Ph and Temperature. *Planta* 161: 308–313.
  23. Bird IF, Cornelius MJ, Keys AJ (1982) Affinity of Rubp Carboxylases for Carbon-Dioxide and Inhibition of the Enzymes by Oxygen. *J Exp Bot* 33: 1004–1013.
  24. Lilley RM, Ralph PJ, Larkum AWD (2010) The determination of activity of the enzyme Rubisco in cell extracts of the dinoflagellate alga *Symbiodinium* sp by manganese chemiluminescence and its response to short-term thermal stress of the alga. *Plant Cell Environ* 33: 995–1004.
  25. Takahashi S, Murata N (2006) Glycerate-3-phosphate, produced by CO<sub>2</sub> fixation in the Calvin cycle, is critical for the synthesis of the D1 protein of photosystem II. *Biochimica Et Biophysica Acta-Bioenergetics* 1757: 198–205.
  26. Takahashi S, Murata N (2008) How do environmental stresses accelerate photoinhibition? *Trends Plant Sci* 13: 178–182.
  27. Wen X, Gong H, Lu C (2005) Heat stress induces an inhibition of excitation energy transfer from phycobilisomes to photosystem II but not to photosystem I in a cyanobacterium *Spirulina platensis*. *Plant Physiol Biochem* 43: 389–395.
  28. Takahashi S, Whitney SM, Badger MR (2009) Different thermal sensitivity of the repair of photodamaged photosynthetic machinery in cultured *Symbiodinium* species. *Proc Natl Acad Sci U S A* 106: 3237–3242.
  29. Donner SD (2009) Coping with Commitment: Projected Thermal Stress on Coral Reefs under Different Future Scenarios. *Plos One* 4.
  30. Graham NAJ, McClanahan TR, MacNeil MA, Wilson SK, Polunin NVC, et al. (2008) Climate Warming, Marine Protected Areas and the Ocean-Scale Integrity of Coral Reef Ecosystems. *Plos One* 3.
  31. Schmidt CW (2008) In hot water - Global warming takes a toll on coral reefs. *Environ Health Perspectives* 116: A292–A299.
  32. Crabbe MJC (2008) Climate change, global warming and coral reefs: Modelling the effects of temperature. *Comput Biol Chem* 32: 311–314.
  33. Singh M, Yamamoto Y, Satoh K, Aro EM, Kanervo E (2005) Post-illumination-related loss of photochemical efficiency of Photosystem II and degradation of the D1 protein are temperature-dependent. *J Plant Physiol* 162: 1246–1253.
  34. Yamasaki T, Yamakawa T, Yamane Y, Koike H, Satoh K, et al. (2002) Temperature acclimation of photosynthesis and related changes in photosystem II electron transport in winter wheat. *Plant Physiol* 128: 1087–1097.
  35. Balogi Z, Torok Z, Balogh G, Josvay K, Shigapova N, et al. (2005) “Heat shock lipid” in cyanobacteria during heat/light-acclimation. *Archives of Biochemistry and Biophysics* 436: 346–354.
  36. Nanjo Y, Mizusawa N, Wada H, Slabas AR, Hayashi H, et al. (2010) Synthesis of fatty acids de novo is required for photosynthetic acclimation of *Synechocystis* sp. PCC 6803 to high temperature. *Biochim Biophys Acta* 1797: 1483–1490.
  37. Shlyk-Kerner O, Samish I, Kaftan D, Holland N, Sai PS, et al. (2006) Protein flexibility acclimatizes photosynthetic energy conversion to the ambient temperature. *Nature* 442: 827–830.
  38. Kless H, Orenshamir M, Malkin S, Mcintosh L, Edelman M (1994) The D-E Region of the D1 Protein Is Involved in Multiple Quinone and Herbicide Interactions in Photosystem-II. *Biochemistry* 33: 10501–10507.
  39. Ferreira KN, Iverson TM, Maghlaoui K, Barber J, Iwata S (2004) Architecture of the photosynthetic oxygen-evolving center. *Science* 303: 1831–1838.
  40. Guskov A, Kern J, Gabdulkhakov A, Broser M, Zouni A, et al. (2009) Cyanobacterial photosystem II at 2.9-Å resolution and the role of quinones, lipids, channels and chloride. *Nat Struct Mol Biol* 16: 334–342.
  41. Loll B, Kern J, Saenger W, Zouni A, Biesiadka J (2005) Towards complete cofactor arrangement in the 3.0 Å resolution structure of photosystem II. *Nature* 438: 1040–1044.
  42. Gombos Z, Wada H, Hideg E, Murata N (1994) The Unsaturation of Membrane-Lipids Stabilizes Photosynthesis against Heat-Stress. *Plant Physiology* 104: 563–567.
  43. Pearcy RW (1978) Effect of Growth Temperature on Fatty-Acid Composition of Leaf Lipids in *Atriplex-Lentiformis*(Torr)-Wats. *Plant Physiology* 61: 484–486.
  44. Wada H, Murata N (1990) Temperature-Induced Changes in the Fatty-Acid Composition of the Cyanobacterium, *Synechocystis Pcc6803*. *Plant Physiology* 92: 1062–1069.
  45. Sakurai I, Shen JR, Leng J, Ohashi S, Kobayashi M, et al. (2006) Lipids in oxygen-evolving photosystem II complexes of cyanobacteria and higher plants. *J Biochem* 140: 201–209.
  46. Behrenfeld MJ, Prasil O, Kolber ZS, Babin M, Falkowski PG (1998) Compensatory changes in Photosystem II electron turnover rates protect photosynthesis from photoinhibition. *Photosynth Res* 58: 259–268.
  47. Kana R, Lazar D, Prasil O, Naus J (2002) Experimental and theoretical studies on the excess capacity of Photosystem II. *Photosynth Res* 72: 271–284.
  48. Somero GN (1978) Temperature Adaptation of Enzymes - Biological Optimization through Structure-Function Compromises. *Annu Rev Ecol Syst* 9: 1–29.
  49. Rader AJ (2010) Thermostability in rubredoxin and its relationship to mechanical rigidity. *Phys Biol* 7: 016002.
  50. Umena Y, Kawakami K, Shen JR, Kamiya N (2011) Crystal structure of oxygen-evolving photosystem II at a resolution of 1.9 angstrom. *Nature* 473: 55–U65.
  51. Loll B, Kern J, Saenger W, Zouni A, Biesiadka J (2007) Lipids in photosystem II: Interactions with protein and cofactors. *Biochim Biophys Acta, Bioenerg* 1767: 509–519.
  52. Kumar S, Nussinov R (2001) How do thermophilic proteins deal with heat? *Cell Mol Life Sci* 58: 1216–1233.
  53. Vanwalraven HS, Koppelaar E, Marvin HJP, Hagendoorn MJM, Kraayenhof R (1984) Lipid Specificity for the Reconstitution of Well-Coupled Atpase Proteoliposomes and a New Method for Lipid Isolation from Photosynthetic Membranes. *Eur J Biochem* 144: 563–569.
  54. Laczko-Dobos H, Szalontai B (2009) Lipids, Proteins, and Their Interplay in the Dynamics of Temperature-Stressed Membranes of a Cyanobacterium, *Synechocystis PCC 6803*. *Biochemistry* 48: 10120–10128.
  55. Lichtenthaler HK, Wellburn AR (1983) Determinations of total carotenoids and chlorophylls a and b of leaf extracts in different solvents. *Biochem Soc Trans* 603: 591–592.
  56. Yamaoka T, Satoh K, Katoh S (1978) Photosynthetic Activities of a Thermophilic Blue-Green-Alga. *Plant and Cell Physiology* 19: 943–954.
  57. Ravnikar PD, Debus R, Sevrinck J, Saetaert P, Mcintosh L (1989) Nucleotide-Sequence of a 2nd-Psba Gene from the Unicellular Cyanobacterium *Synechocystis 6803*. *Nucleic Acids Res* 17: 3991–3991.
  58. Komenda J, Lupinkova L, Kopecky J (2002) Absence of the psbH gene product destabilizes photosystem II complex and bicarbonate binding on its acceptor side in *Synechocystis PCC 6803*. *Eur J Biochem* 269: 610–619.
  59. Abramoff MD, Magelhaes PJ, Ram SJ (2004) Image Processing with ImageJ. *Biophotonics Int* 11: 36–42.
  60. Cunningham FX, Dennenberg RJ, Mustardy L, Jursinic PA, Gantt E (1989) Stoichiometry of Photosystem I, Photosystem II, and Phycobilisomes in the Red Alga *Porphyridium cruentum* as a Function of Growth Irradiance. *Plant Physiol* 91: 1179–1187.
  61. Hara A, Radin NS (1978) Lipid Extraction of Tissues with a Low-Toxicity Solvent. *Anal Biochem* 90: 420–426.
  62. Morrison WR, Smith LM (1964) Preparation of Fatty Acid Methyl Esters and Dimethylacetals from Lipids with Boron Fluoride–Methanol. *J Lipid Res* 5: 600–608.
  63. Cser K, Vass I (2007) Radiative and non-radiative charge recombination pathways in Photosystem II studied by thermoluminescence and chlorophyll fluorescence in the cyanobacterium *Synechocystis 6803*. *Biochim Biophys Acta, Bioenerg* 1767: 233–243.
  64. Word JM, Lovell SC, LaBean TH, Taylor HC, Zalis ME, et al. (1999) Visualizing and quantifying molecular goodness-of-fit: Small-probe contact dots with explicit hydrogen atoms. *J Mol Biol* 285: 1711–1733.
  65. Vreven T, Byun KS, Komaromi I, Dapprich S, Montgomery JA, et al. (2006) Combining quantum mechanics methods with molecular mechanics methods in ONIOM. *J Chem Theory Comput* 2: 815–826.
  66. Frisch MJ (2006) Optimizing large molecules with Gaussian 03. *Chem Listy* 100: A9–A9.
  67. Becke AD (1993) Density-Functional Thermochemistry .3. The Role of Exact Exchange. *J Chem Phys* 98: 5648–5652.
  68. Lee CT, Yang WT, Parr RG (1988) Development of the Colle-Salvetti Correlation-Energy Formula into a Functional of the Electron-Density. *Phys Rev B* 37: 785–789.
  69. Morozov AV, Kortemme T, Tsemekhan K, Baker D (2004) Close agreement between the orientation dependence of hydrogen bonds observed in protein structures and quantum mechanical calculations. *Proc Natl Acad Sci USA* 101: 6946–6951.
  70. Hao MH (2006) Theoretical calculation of hydrogen-bonding strength for drug molecules. *J Chem Theory Comput* 2: 863–872.
  71. Cornell WD, Cieplak P, Bayly CI, Gould IR, Merz KM, et al. (1995) A 2nd Generation Force-Field for the Simulation of Proteins, Nucleic-Acids, and Organic-Molecules. *Journal of the American Chemical Society* 117: 5179–5197.

72. Krieger E, Koraimann G, Vriend G (2002) Increasing the precision of comparative models with YASARA NOVA—a self-parameterizing force field. *Proteins* 47: 393–402.
73. Krieger E, Darden T, Nabuurs SB, Finkelstein A, Vriend G (2004) Making optimal use of empirical energy functions: Force-field parameterization in crystal space. *Proteins: Struct, Funct, Bioinf* 57: 678–683.
74. Essmann U, Perera L, Berkowitz ML, Darden T, Lee H, et al. (1995) A Smooth Particle Mesh Ewald Method. *J Chem Phys* 103: 8577–8593.
